# Supplementary material
Source: Springer Nature journal article supplement (https://www.springermedizin.de/resource/supplementary/12962_2008_111_MOESM2_ESM.pdf/9572222)
Supplement: MOESM2 [file 9572222]

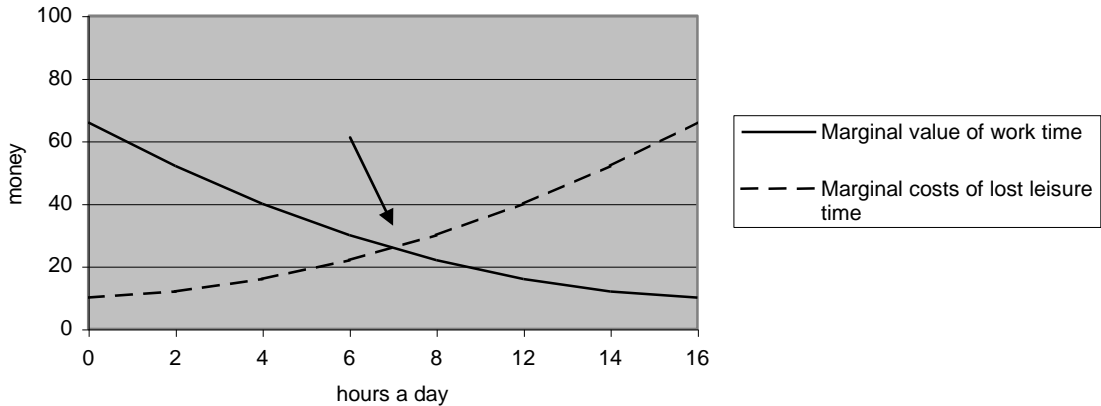

The arrow indicates the point at which the marginal value of work and the marginal costs of leisure time are equal.
